# Supplementary material for: Parasitism modifies the direct effects of warming on a hemiparasite and its host
Source: PubMed Central journal article supplement (PMC6821401; doi:10.1371/journal.pone.0224482), 2019-10-30

**Fig S1.** Photographs of haustoria (A-D) produced by *Castilleja sulphurea*, taken under a dissecting microscope at 20X magnification. Black arrows point to haustorial connections between *C. sulphurea* and *Bouteloua gracilis* roots.

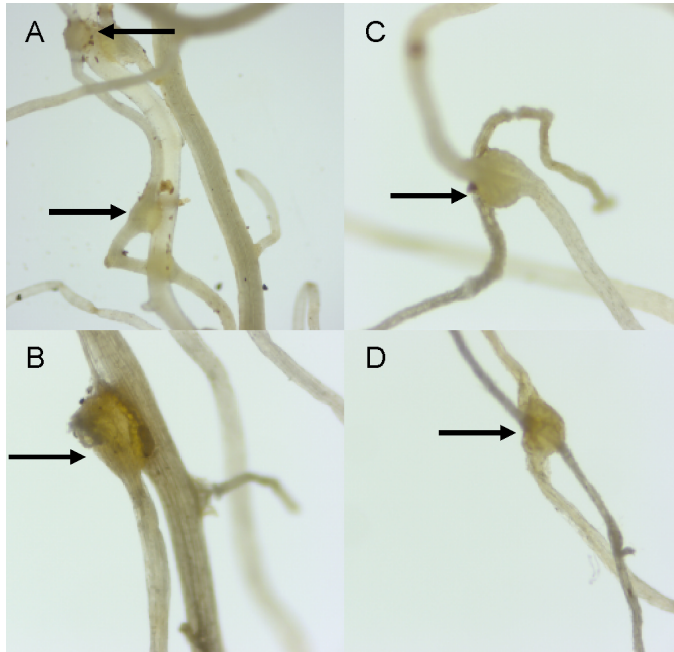

Supplement: pone.0224482.s002.pdf [file pone.0224482.s002.pdf]
