# Supplementary material for: Parasitism modifies the direct effects of warming on a hemiparasite and its host
Source: PubMed Central journal article supplement (PMC6821401; doi:10.1371/journal.pone.0224482), 2019-10-30
Supplement: pone.0224482.s003.pdf [file pone.0224482.s003.pdf]

**Table S1.** Linear models for greenhouse temperature data, with all data (all), only daytime data (day), only nighttime data (night), daily maximum (maximum), or daily minimum (minimum) as the response variable and temperature treatment (ambient vs. warmed) as the predictor.

| Temperature | Estimate | SE     | t    | df     | P                  |
|-------------|----------|--------|------|--------|--------------------|
| All         | 2.60     | 0.0804 | 32.3 | 13,258 | <b>&lt;0.00001</b> |
| Day         | 3.61     | 0.104  | 34.7 | 5,668  | <b>&lt;0.00001</b> |
| Night       | 1.84     | 0.0720 | 25.5 | 7,588  | <b>&lt;0.00001</b> |
| Maximum     | 5.77     | 0.399  | 14.5 | 138    | <b>&lt;0.00001</b> |
| Minimum     | 1.53     | 0.326  | 4.69 | 138    | <b>&lt;0.00001</b> |
